# Supplementary material
Source: PubMed Central journal article supplement (PMC4197802)
Supplement: NIHMS581447-supplement-01.pdf [file NIHMS581447-supplement-01.pdf]

**TABLE 3.** Characteristics of total population.

|                                                 | <b>Control</b>   | <b>Dry Eye</b>     |
|-------------------------------------------------|------------------|--------------------|
| N (% of Total)                                  | 26 (18.2%)       | 117 (81.8%)        |
| Age (years $\pm$ SD)                            | 29.7 $\pm$ 5.4   | 29.9 $\pm$ 5.2     |
| Female/Male                                     | 14/12            | 60/57              |
| Schirmer test with anesthesia (mm) <sup>#</sup> | 25.09 $\pm$ 8.87 | 18.26 $\pm$ 10.06* |
| Rose Bengal Staining <sup>#</sup>               | 0.00 $\pm$ 0.00  | 0.14 $\pm$ 0.40    |
| TBUT (s) <sup>#</sup>                           | 14.83 $\pm$ 7.30 | 14.36 $\pm$ 7.89   |
| McMonnies Questionnaire <sup>#</sup>            | 7.42 $\pm$ 4.23  | 9.38 $\pm$ 4.05*   |

<sup>#</sup>: Clinical assessments 12 months post-refractive surgery; TBUT: Tear break-up time. SD: standard deviation; S: seconds. \*p-value < 0.05
