# Supplementary material
Source: PubMed Central journal article supplement (PMC4197802)
Supplement: NIHMS581447-supplement-02.pdf [file NIHMS581447-supplement-02.pdf]

**TABLE 5.** Allelic frequencies of analyzed thrombospondin-1 gene (*THBS1*) polymorphisms in the study population and HapMap population.

| SNP                     | Allele Frequencies (%) |          |                  |          |
|-------------------------|------------------------|----------|------------------|----------|
|                         | HapMap Population*     |          | Study Population |          |
| <b>SNP1(rs1478604)</b>  | <b>T</b>               | <b>C</b> | <b>T</b>         | <b>C</b> |
| CEU                     | 78                     | 22       | 76.2             | 23.8     |
| YRI                     | 20                     | 80       | 21.6             | 78.4     |
| <b>SNP2 (rs2228261)</b> | <b>C</b>               | <b>T</b> | <b>C</b>         | <b>T</b> |
| CEU                     | 90                     | 10       | 91               | 9        |
| YRI                     | 54                     | 46       | 52.7             | 47.3     |
| <b>SNP3 (rs2292305)</b> | <b>A</b>               | <b>G</b> | <b>A</b>         | <b>G</b> |
| CEU                     | 90                     | 10       | 90.1             | 9.9      |
| YRI                     | 53                     | 47       | 50.8             | 49.2     |
| <b>SNP4 (rs2228262)</b> | <b>A</b>               | <b>G</b> | <b>A</b>         | <b>G</b> |
| CEU                     | 92                     | 8        | 90.2             | 9.8      |
| YRI                     | 99                     | 1        | 99.1             | 0.9      |

SNP: single nucleotide polymorphism. CEU = Utah residents with ancestry from northern and western Europe; YRI = African from Yoruba tribe of Ibadan, Nigeria. \*JPT (Japanese in Tokyo) and CHB (Chinese in Beijing, China) populations not included as these were clustered together in study population.
