# Supplementary material
Source: PubMed Central journal article supplement (PMC4197802)
Supplement: NIHMS581447-supplement-03.pdf [file NIHMS581447-supplement-03.pdf]

# HapMap Populations

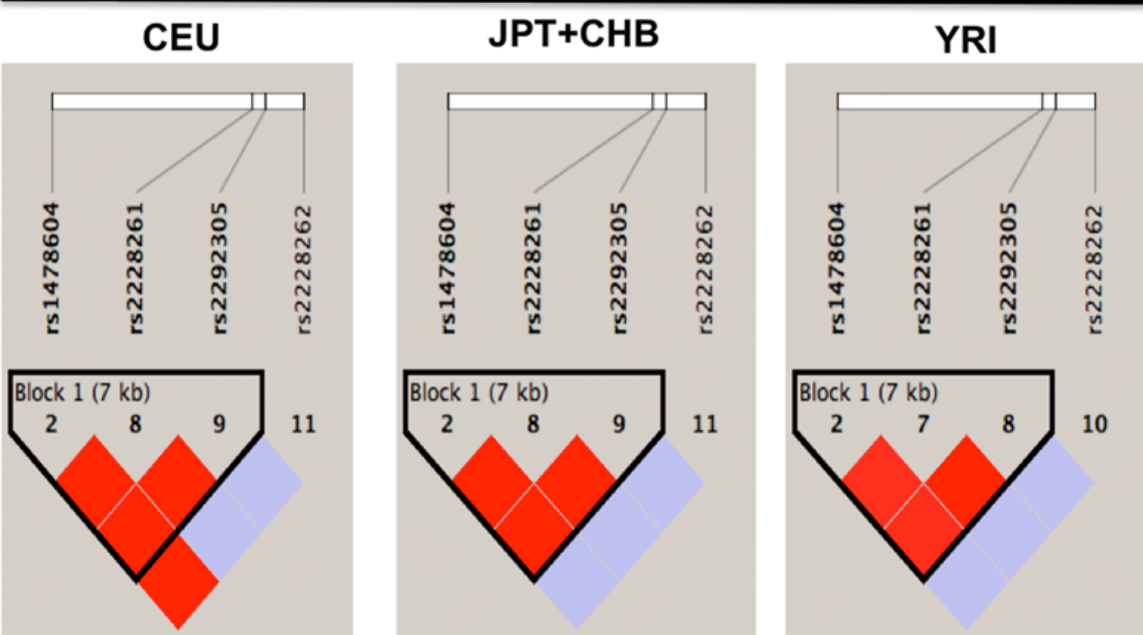

**FIGURE 4. Linkage disequilibrium (LD) pattern of four analyzed single nucleotide polymorphisms (SNPs) in the study population resembled those detected in HapMap populations.** The figure shows the  $D'$ -based pairwise LD map of 4 SNPs genotyped in HapMap populations. Darker shades of red indicate higher LD coefficient ( $D'$ ). The same haplotype block was outlined in the three populations.
